# Supplementary material for: Green synthesis of BiOBr modified Bi2O2CO3 nanocomposites with enhanced visible-responsive photocatalytic properties
Source: Royal Society of Chemistry journal article supplement (doi:10.1039/c6ra22385k), 2016-01-01
Supplement: c6ra22385k1.pdf [file c6ra22385k1.pdf]

## Supporting Information for

Green synthesis of BiOBr modified  $\text{Bi}_2\text{O}_2\text{CO}_3$  nanocomposites with  
enhanced visible-responsive photocatalytic properties

Nana Guo, Yali Cao\*, Yaling Rong, Diansheng Jia

*Key Laboratory of Energy Materials Chemistry, Ministry of Education, Key  
Laboratory of Advanced Functional Materials, Autonomous Region, Institute of  
Applied Chemistry, Xinjiang University, Urumqi, Xinjiang 830046, China*

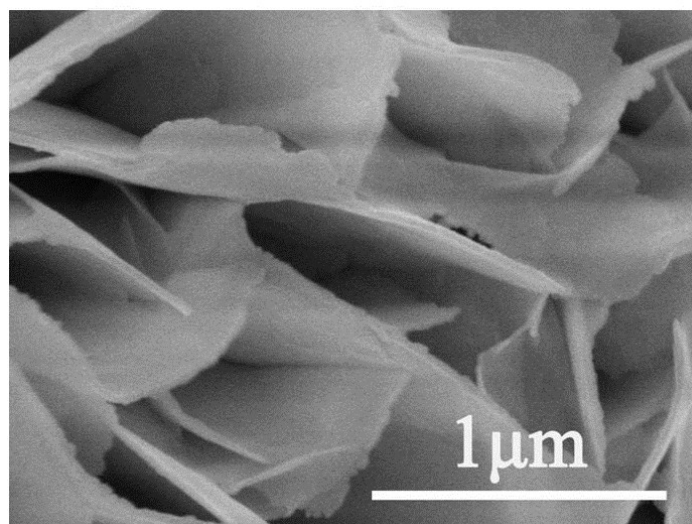

Fig. S1. SEM images of 60%  $\text{Bi}_2\text{O}_2\text{CO}_3/\text{BiOBr}$  sample.

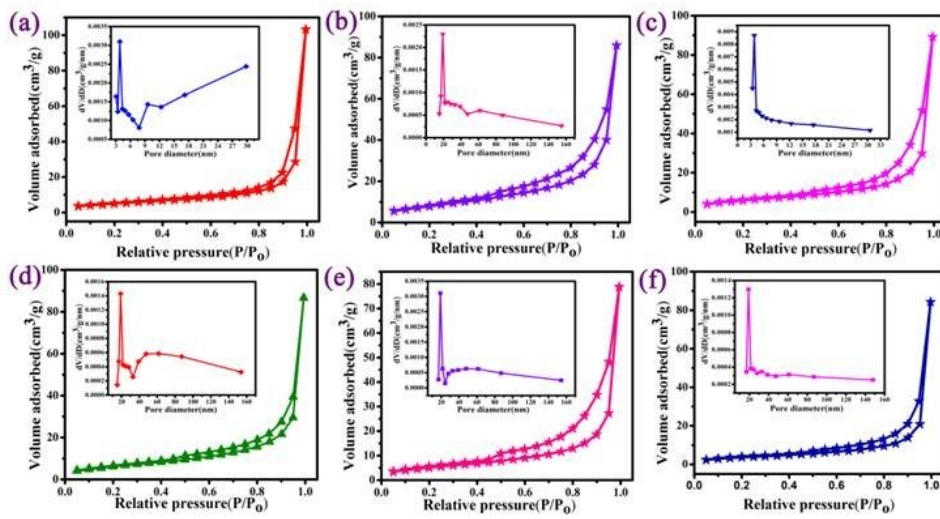

Fig. S2. Nitrogen adsorption-desorption isotherms and pore size distribution for: (a)  $\text{Bi}_2\text{O}_2\text{CO}_3$ , (b) 20%  $\text{Bi}_2\text{O}_2\text{CO}_3/\text{BiOBr}$ , (c) 40%  $\text{Bi}_2\text{O}_2\text{CO}_3/\text{BiOBr}$ , (d) 60%  $\text{Bi}_2\text{O}_2\text{CO}_3/\text{BiOBr}$ , (e) 80%  $\text{Bi}_2\text{O}_2\text{CO}_3/\text{BiOBr}$  and (f)  $\text{BiOBr}$ .

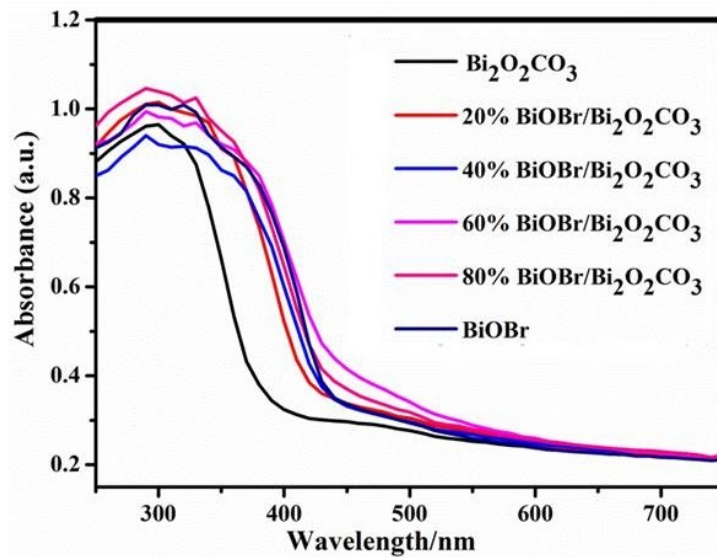

Fig. S3. UV-visible diffuse reflectance spectra of the as-prepared samples.

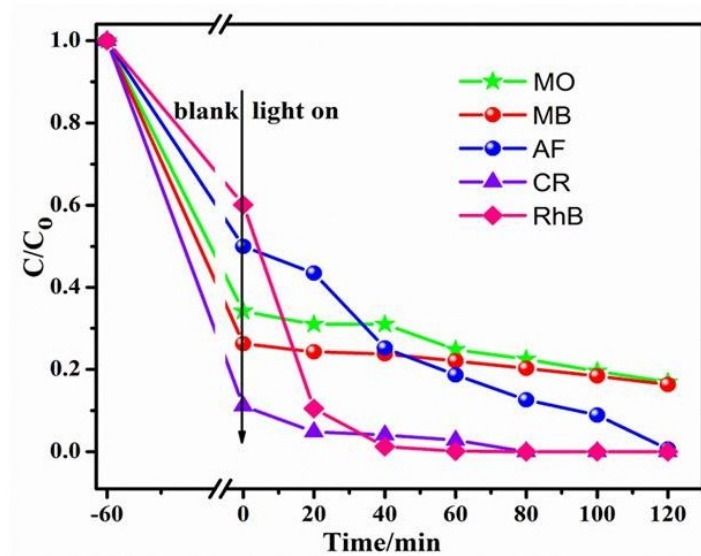

Fig. S4. Photocatalytic degradation curves of 60% Bi<sub>2</sub>O<sub>2</sub>CO<sub>3</sub>/ BiOBr sample for methyl orange (MO, 10 mg/L), methyl blue (MB, 20 mg/L), acid fuchsin (AF, 20 mg/L), congo red (CR, 20 mg/L) and rhodamine B (RhB, 20 mg/L) under visible light irradiation.

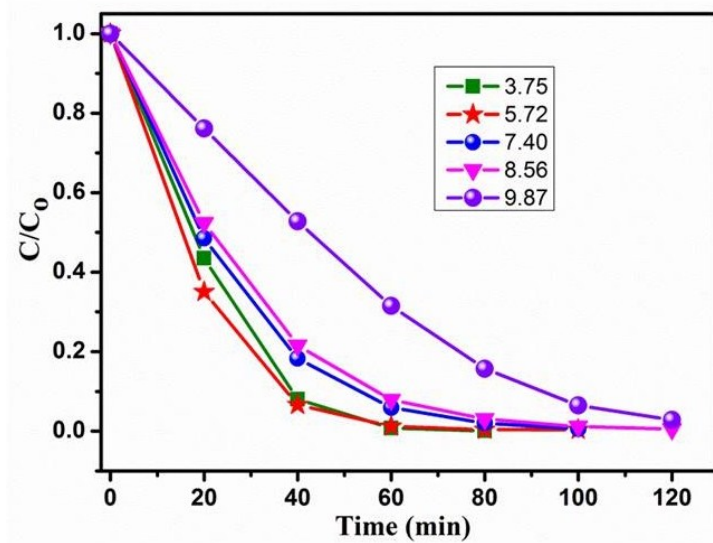

Fig. S5. Photocatalytic degradation curves of RhB solutions with different initial pH over 60% BiOBr/Bi<sub>2</sub>O<sub>2</sub>CO<sub>3</sub> sample.

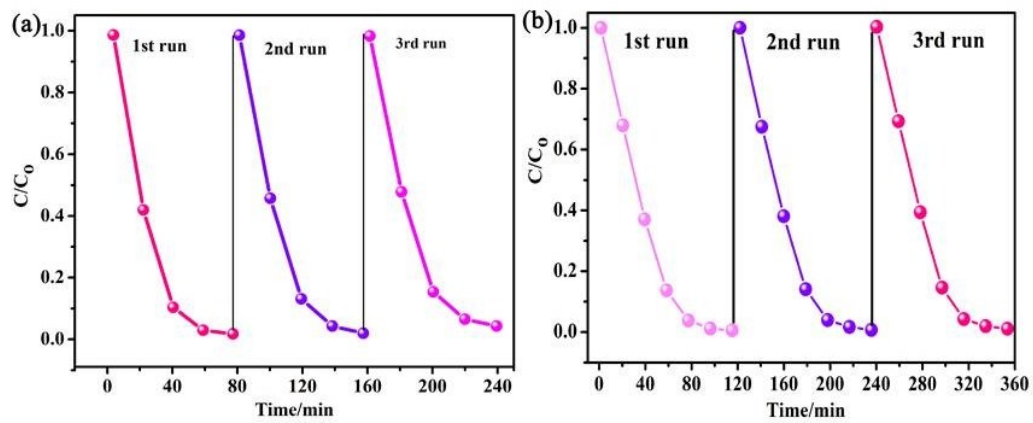

Fig. S6. Cycling runs of (a) 60% BiOBr/Bi<sub>2</sub>O<sub>2</sub>CO<sub>3</sub> and (b) single BiOBr samples under visible-light irradiation.
